# Supplementary material
Source: PubMed Central journal article supplement (PMC8634068)
Supplement: awab179_supplementary_data.pdf [file awab179_supplementary_data.pdf]

# **Giant axonal neuropathy: Cross sectional analysis of a large natural history cohort**

## **Supplementary Materials**

### **Supplementary Methods**

#### **Description of Motor Assessments**

Motor strength was quantitatively measured using a handheld dynamometer (MicroFET®2 [hogganhealth.net]) for knee flexion and extension, hip abduction, and elbow flexion and extension strength, with distal strength measured using grip and pinch dynamometers (MyoGrip and MyoPinch [Ateliers Laumonier, France,]). Handheld dynamometry results were expressed as the percentage of the highest value compared to age/weight/sex-based norms,<sup>45</sup> and distal strength results were expressed as the percentage of the highest value compared to age-based norms.<sup>46</sup> The following timed functional testing were administered when applicable: time to arise from lying supine on floor to standing; time to run 10 meters and time to ascend and descend four steps. Tasks were reported and analysed based on time for completion.

#### **Description of Autonomic Testing Methods**

The Q-Sweat was performed on the Q-Sweat Device (WR Medical Electronics Co., Maplewood, MN) using standard iontophoresis methodology and 10% acetylcholine. Iontophoresis chambers were placed on the forearm and medial ankle and sweat volume was recorded ( $\mu\text{l}/\text{mm}^2$ ). Tilt table and HRDB were performed using beat-to-beat blood pressure and heart rate monitoring (WR Medical Electronics, Inc, Maplewood, MN). Tilt table testing was performed only in ambulatory individuals, with a head-up tilt of 70 degrees for 10 minutes after at least 20 minutes in the supine position. Changes in heart rate and BP are continuously recorded during head up tilt and after return to supine position. HRDB was performed by having the subject take 6-8 slow deep breaths with 10 seconds per respiratory cycle. Results are recorded as the average difference between the inspiratory and expiratory heart rates and are age dependent. Basal lacrimal secretion was evaluated (Schirmer I with topical anaesthesia)

using strips of blotting paper placed into the lower conjunctival fornix of the patient for 5 minutes and then measuring the extent of lacrimal secretion, reported here in millimetres (mm) from the right eye (OD).<sup>34,47</sup> Severity of the reduction of lacrimation (unilateral) was defined as: Severe < 5 mm, Moderate 5-9 mm, Mild 10-14 mm, and Normal > 15 mm. Patients on medications that may affect lacrimation or cholinergic function were excluded in the final analysis.

**Supplementary Table 1: Cohort genotype, phenotype, and functional data**

| Patient | Clinical Description/ Severity Score |         |                                |                   |                                         |          |                 |           |                     |                 |              | Phenotype                | Ambulatory Status |                                 |
|---------|--------------------------------------|---------|--------------------------------|-------------------|-----------------------------------------|----------|-----------------|-----------|---------------------|-----------------|--------------|--------------------------|-------------------|---------------------------------|
|         | Age (Yr)                             | MFM32 % | FARS FXN (Item 1) <sup>a</sup> | Age First Concern | Early Clinical Concern                  | Genetics |                 |           |                     |                 |              |                          | Ambulant          | Age Loss Independent Ambulation |
| 1       | 8                                    | 100     | 0.5                            | 8 yr              | High Arch, Curly Hair, Affected sibling | exon 11  | c.1720C>T       | p.R574C   | exon 4              | c.837_839delTGG | p.G280del    | <i>axonal CMT (plus)</i> | Amb               |                                 |
| 39      | 14                                   | 98.9    | 0.5                            | 5 yr              | Tripping                                | exon 5   | c.944C>T        | p.P315L   | whole gene deletion |                 |              | <i>axonal CMT (plus)</i> | Amb               |                                 |
| 2       | 13                                   | 94.8    | 0.5                            | 5 yr              | Abnormal gait; Fine motor difficulty    | exon 11  | c.1720C>T       | p.R574C   | exon 4              | c.837_839delTGG | p.G280del    | <i>axonal CMT (plus)</i> | Amb               |                                 |
| 37      | 5                                    | 90*     | 1.5                            | 1 yr              | Abnormal gait                           | exon 6   | c.994G>A        | p.G332R   | exon 6              | c.994G>A        | p.G332R      | Classic                  | Amb               |                                 |
| 11      | 5                                    | 90*     | 2.5                            | 3 yr              | Feeding difficulty, weak grip           | exon 3   | c.535_537delAAA | p.K179del | exon 3              | c.316_318delGTT | p.V106del    | Classic                  | Amb               |                                 |
| 12      | 5                                    | 88.3*   | 1.5                            | 3 yr              | Abnormal gait, frequent falls           | exon 3   | c.601C>T        | p.R201*   | exon 3              | c.601C>T        | p.R201*      | Classic                  | Amb               |                                 |
| 36      | 8                                    | 87.5    | 1                              | 3 yr              | Abnormal gait                           | exon 9   | c.1391G>A       | p.C464Y   | exon 9              | c.1477G>A       | p.E493K      | <i>axonal CMT (plus)</i> | Amb               |                                 |
| 19      | 10                                   | 87.5    | 2                              | 5 yr              | Flat feet, Abnormal gait                | intron 3 | c.633+2T>C      |           | exon 8              | c.1241G>A       | p.G414D      | <i>axonal CMT (plus)</i> | Amb               |                                 |
| 42      | 18                                   | 84.4    | 2                              | 8 yr              | Abnormal gait                           | exon 10  | c.1506G>T       | p.W502C   | exon 5              | c.944C>T        | p.P315L      | <i>axonal CMT (plus)</i> | Amb               |                                 |
| 3       | 6                                    | 83.3    | 2                              | 3 yr              | Frequent falls, foot drop               | exon 4   | c.805C>T        | p.R269W   | exon 4              | c.732delT       | p.I244Mfs*33 | Classic                  | Amb               |                                 |
| 30      | 8                                    | 82.3    | 1.5                            | 2 yr              | Abnormal gait, frequent falls           | Intron 2 | c.283-1G>A      |           | exon 3              | c.306C>G        | p.I102M      | <i>axonal CMT (plus)</i> | Amb               |                                 |
| 44      | 8                                    | 80.2    | 2                              | 2 yr              | Frequent falls                          | exon 3   | c.545T>A        | p.I182N   | exon 11             | c.1729A>T       | p.N577Y      | <i>axonal CMT (plus)</i> | Amb               |                                 |
| 41      | 6                                    | 79.17   | 2                              | 3 yr              | Abnormal gait, frequent falls           | exon 3   | c.374T>C        | p.L125S   | exon 3              | c.374T>C        | p.L125S      | Classic                  | Amb               |                                 |
| 45      | 3                                    | 75*     | 2                              | 1 yr              | Delayed walking                         | exon 6   | c.997G>A        | p.G333S   | exon 6              | c.997G>A        | p.G333S      | Classic                  | Amb               |                                 |

Supplementary Table 1 (continued):

| Patient | Clinical Description/ Severity Score |         |                                |                   |                                 |            |                         |             |            |                     |         | Phenotype         | Ambulatory Status |                                 |
|---------|--------------------------------------|---------|--------------------------------|-------------------|---------------------------------|------------|-------------------------|-------------|------------|---------------------|---------|-------------------|-------------------|---------------------------------|
|         | Age (Yr)                             | MFM32 % | FARS FXN (Item 1) <sup>2</sup> | Age First Concern | Early Clinical Concern          | Genetics   |                         |             |            |                     |         |                   | Ambulant          | Age Loss Independent Ambulation |
| 35      | 5                                    | 75*     | 2                              | 2 yr              | Abnormal gait, frequent falls   | intron 4   | c.851+1G>A              |             | intron 4   | c.851+1G>A          |         | Classic           | Amb               |                                 |
| 34      | 16                                   | 75      | 2                              | 13 yr             | Nausea; falls                   | Exons 2-5  | partial deletion        |             | exon 5     | c.944C>T            | p.P315L | axonal CMT (plus) | Amb               |                                 |
| 28      | 6                                    | 72.9    | 2                              | 3 yr              | Frequent falls                  | exon 4     | c.806G>A                | p.R269Q     | exon 4     | c.806G>A            | p.R269Q | Classic           | Amb               |                                 |
| 32      | 10                                   | 72.9    | 1.5                            | 2 yr              | Abnormal gait                   | exon 7     | c.1157delA              | p.K386Rfs*3 | exon 4     | c.838G>A            | p.G280R | Classic           | Amb               |                                 |
| 15      | 7                                    | 72.9    | 3                              | 18 mo             | Abnormal gait                   | exon 3     | c.374T>C                | p.L125S     | exon 3     | c.374T>C            | p.L125S | Classic           | Amb               |                                 |
| 17      | 6                                    | 72.9    | 3.5                            | 3 yr              | Abnormal gait, foot abnormality | exon 2     | c.266A>C                | p.Y89S      | exon 2     | c.266A>C            | p.Y89S  | Classic           | Amb               |                                 |
| 21      | 21                                   | 71.9    | 3                              | 3 yr              | Abnormal gait                   |            | GAN whole gene deletion |             | exon 3     | c.413G>T            | p.R138L | axonal CMT (plus) | AmAs              | 17 yr                           |
| 24      | 5                                    | 71.7    | 3.5                            | 16 mo             | Abnormal gait                   | exon 1     | c.91G>C                 | p.D31H      | Intron 4   | c.852-13T>G         |         | Classic           | Amb               | 5 yr                            |
| 43      | 5                                    | 71.7    | 2.5                            | 6 mo              | Foot abnormality                | exon 1     | c.1-167+1del            | p.0?        | exon 5     | c.973G>A            | p.E325K | Classic           | Amb               |                                 |
| 22      | 6                                    | 69.8    | 2.5                            | 4 yr              | Abnormal gait, frequent falls   | intron 4   | c.851+1G>A              |             | intron 4   | c.851+1G>A          |         | Classic           | Amb               |                                 |
| 14      | 7                                    | 68.8    | 3                              | 18 mo             | Abnormal gait                   | exon 3     | c.374T>C                | p.L125S     | exon 3     | c.374T>C            | p.L125S | Classic           | Amb               |                                 |
| 25      | 8                                    | 66.7    | 4                              | 3 yr              | Frequent falls                  | exon 1     | c.143T>C                | p.L48P      | exon 1     | c.143T>C            | p.L48P  | Classic           | AmAs              | 5 yr                            |
| 23      | 7                                    | 64.6    | 2                              | 4 yr              | Abnormal gait                   | intron 4   | c.851+1G>A              |             | intron 4   | c.851+1G>A          |         | Classic           | Amb               |                                 |
| 29      | 7                                    | 61.5    | 3.5                            | 2 yr              | Frequent falls                  | exon 3     | c.545T>A                | p.I182N     | exon 3     | c.545T>A            | p.I182N | Classic           | AmAs              | 6 yr                            |
| 4       | 9                                    | 60.4    | 4.5                            | 3 yr              | Abnormal gait; foot abnormality | exon 10-11 | c.1647-8680_*258del     |             | exon 10-11 | c.1647-8680_*258del |         | Classic           | AmAs              | 7 yr                            |

Supplementary Table 1 (continued):

| Patient | Clinical Description/ Severity Score |         |                                |                   |                                 |                                                                      |                                              |          |                                |                         |              | Phenotype | Ambulatory Status |                                 |
|---------|--------------------------------------|---------|--------------------------------|-------------------|---------------------------------|----------------------------------------------------------------------|----------------------------------------------|----------|--------------------------------|-------------------------|--------------|-----------|-------------------|---------------------------------|
|         | Age (Yr)                             | MFM32 % | FARS FXN (Item 1) <sup>a</sup> | Age First Concern | Early Clinical Concern          | Genetics                                                             |                                              |          |                                |                         |              |           | Ambulant          | Age Loss Independent Ambulation |
| 13      | 9                                    | 59.4    | 4                              | 2 yr              | Abnormal gait                   | exon 3                                                               | c.374T>C                                     | p.L125S  | exon 3                         | c.374T>C                | p.L125S      | Classic   | AmAs              | 7 yr                            |
| 5       | 11                                   | 55.2    | 4.5                            | 5 yr              | Frequent falls, turning of feet | intron 4                                                             | c.851+5G>A                                   |          | exon 7                         | c.1236+1G>A             |              | Classic   | AmAs              | 10 yr                           |
| 7       | 12                                   | 55.2    | 5.5                            | 1 yr              | Delayed milestones              | exon 9                                                               | c.1456G>A                                    | p. E486K | 1st intron - 3rd exon deletion | 57-131 kb microdeletion |              | Classic   | NAmb              | 8 yr                            |
| 16      | 10                                   | 53.1    | 3.5                            | 2 yr              | Abnormal gait, frequent falls   | exon 1                                                               | c.1-?_167+?del                               | p.0?     | exon 1                         | c.1-?_167+?del          | p.0?         | Classic   | AmAs              | 9 yr                            |
| 26      | 11                                   | 53.1    | 5                              | 3 yr              | Frequent falls                  | exon 2                                                               | c.213T>A                                     | p.Y71*   | exon 10                        | c.1539_1540delinsT      | p.A514Pfs*12 | Classic   | AmAs              | 5 yr                            |
| 27      | 12                                   | 52.1    | 4.5                            | 3 yr              | Abnormal gait, frequent falls   | intron 4                                                             | c.851+1G>A                                   |          | intron 4                       | c.851+1G>A              |              | Classic   | AmAs              | 9 yr                            |
| 40      | 8                                    | 50      | 4.5                            | 3 yr              | Frequent falls                  | intron 4                                                             | c.851+1G>A                                   |          | intron 4                       | c.851+1G>A              |              | Classic   | NAmb              | 7 yr                            |
| 6       | 9                                    | 49      | 5                              | 2 yr              | Frequent falls                  | exon 4                                                               | c.805C>T                                     | p.R269W  | exon 4                         | c.732delT               | p.I244Mfs*33 | Classic   | NAmb              | 8 yr                            |
| 31      | 6                                    | 46      | 4.5                            | 3 yr              | Frequent falls                  | exon 3                                                               | c.484C>T                                     | p.R162*  | exon 3                         | c.484C>T                | p.R162*      | Classic   | AmAs              | 5                               |
| 18      | 11                                   | 44.8    | 5                              | 15 mo             | Delayed walking/ abnormal gait  | exon 4                                                               | c.724C>T                                     | p.R242*  | exon 4                         | c.724C>T                | p.R242*      | Classic   | NAmb              | 10 yr                           |
| 33      | 10                                   | 41.7    | 5                              | 3 yr              | Frequent falls                  | exon 9                                                               | c.1382C>T                                    | p.A461V  | exon 9                         | c.1382C>T               | p.A461V      | Classic   | NAmb              | 5 yr                            |
| 9       | 11                                   | 38.5    | 6                              | 12 mo             | Frequent falls, Delayed walking | genomic locations: 81,396,399 in intron 6 and 81,399,587 in intron 9 | 3.2kb deletion encompassing exon 7 to exon 9 |          | exon 9                         | c.1456 G>A              | p.E486K      | Classic   | NAmb              | 9 yr                            |
| 38      | 5                                    | 34*     | 5                              | 9 mo              | Difficulty sitting              | Exon 2                                                               | c.266A>C                                     | p.Y89S   | Exon 2                         | c.266A>C                | p.Y89S       | Classic   | NAmb              | 0                               |
| 8       | 10                                   | 30.2    | 6.0                            | 18 mo             | Delayed walking                 | exon 1                                                               | c.146C>A                                     | p.A49E   | exon 1                         | c.146C>A                | p.A49E       | Classic   | NAmb              | 8 yr                            |
| 10      | 15                                   | 30.2    | 5.5                            | 3 yr              | Abnormal gait                   | exon 6                                                               | c.994G>A                                     | p.G332R  | exon 6                         | c.994G>A                | p.G332R      | Classic   | NAmb              | 12 yr                           |
| 20      | 18                                   | 20.8    | 6                              | 15 mo             | Abnormal gait, frequent falls   | exon 1                                                               | c.1-?_167+?del                               | p.0?     | exon 1                         | c.1-?_167+?del          | p.0?         | Classic   | NAmb              | 8 yr                            |

### **Supplementary Table 1: Legend**

Entire cohort ranked in order by their motor function measure (MFM-32) total percent score. Ambulatory status is listed and appears to correspond to the MFM-32 total percent score. If ambulation has been lost, the age at loss of independent ambulation is listed in parentheses (in years). Genetic variants are listed, and segregation confirmed in 40/ 45 patients (the remaining patients were clinically confirmed by distinct clinical phenotype or nerve pathology findings performed prior to referral to the study). The clinical phenotype defined as classic GAN or axonal CMT (plus) is noted for each patient.

- a) Friedreich Ataxia Rating Scale (FARS) – Item 1 – Rating of Functional Impact of Ataxia (scores ranging from 0= ‘normal’ to 6.0 = ‘confined to wheelchair or bed with total dependency for all ADL’).

Abbreviations in table are as follows: Amb = ambulatory, AmAs = requires assistance for ambulation, mo = month, NAmb = not able to ambulate without an assistive device, yr = year

**Supplementary Table 2: Clinical cohort characteristics**

| Patient | Progression of Primary GAN Related Signs and Symptoms |              |            |                                  |                       |                                         |                         |           |            |                                    |              |                      | Pulmonary   |     | Additional GAN Signs and Symptoms |         |                       |              |             |                    |                          |                    |                 |                   | GAN Imaging        |  |  |
|---------|-------------------------------------------------------|--------------|------------|----------------------------------|-----------------------|-----------------------------------------|-------------------------|-----------|------------|------------------------------------|--------------|----------------------|-------------|-----|-----------------------------------|---------|-----------------------|--------------|-------------|--------------------|--------------------------|--------------------|-----------------|-------------------|--------------------|--|--|
|         | History of Unsteady/Abnormal Gait                     | Contractures | Spasticity | Patellar tendon DTR <sup>a</sup> | Babinski <sup>b</sup> | Scoliosis (Age of surgery) <sup>c</sup> | Decreased visual acuity | Nystagmus | Dysarthria | Dysphagia (Age Onset) <sup>c</sup> | NG or G-tube | Urinary <sup>d</sup> | Sleep Apnea | FVC | Seizures (Age Onset) <sup>e</sup> | Vertigo | Learning Difficulties | Macrocephaly | Hypothermia | Precocious Puberty | Menstrual Irregularities | Lactose Intolerant | MRI brain (CWM) | MRI brain (CerWM) | Spine MRI Thinning |  |  |
| 1       | N                                                     | N            | Y          | +++                              | F                     | N                                       | N                       | N         | N          | N                                  | N            | N                    | ND          | N   | N                                 | N       | Y                     | N            | N           | N                  | N                        | 0                  | 0               | 0                 |                    |  |  |
| 39      | Y                                                     | Y            | Y          | +++                              | E                     | N                                       | N                       | N         | N          | N                                  | N            | N                    | 115         | N   | N                                 | Y       | Y                     | N            | N           | N                  | N                        | 0                  | 0               | 0                 |                    |  |  |
| 2       | Y                                                     | Y            | Y          | +++                              | F                     | N                                       | N                       | N         | N          | N                                  | N            | N                    | ND          | N   | N                                 | N       | N                     | N            | N           | NA                 | N                        | 0                  | 0               | 0                 |                    |  |  |
| 37      | Y                                                     | Y            | N          | -                                | F                     | N                                       | N                       | Y         | N          | Y (birth)                          | N            | N                    | N           | 93  | N                                 | N       | N                     | Y            | N           | N                  | NA                       | Y                  | 0               | I                 | 0                  |  |  |
| 11      | Y                                                     | N            | N          | -                                | F                     | N                                       | N                       | N         | N          | N                                  | N            | N                    | ND          | N   | Y                                 | Y       | N                     | N            | N           | NA                 | Y                        | ND                 | ND              | ND                |                    |  |  |
| 12      | Y                                                     | N            | N          | -                                | F                     | N                                       | N                       | N         | N          | N                                  | N            | N                    | ND          | N   | N                                 | N       | N                     | N            | N           | NA                 | Y                        | 0                  | I               | 0                 |                    |  |  |
| 36      | Y                                                     | Y            | Y          | -                                | M                     | N                                       | N                       | N         | N          | N                                  | N            | Y                    | N           | 113 | N                                 | N       | N                     | Y            | N           | N                  | NA                       | N                  | 0               | 0                 | 0                  |  |  |
| 19      | Y                                                     | Y            | N          | -                                | F                     | N                                       | N                       | N         | N          | N                                  | N            | N                    | N           | 110 | N                                 | N       | N                     | Y            | Y           | N                  | N                        | N                  | 0               | I                 | 0                  |  |  |
| 42      | Y                                                     | Y            | N          | -                                | F                     | N                                       | N                       | N         | N          | N                                  | N            | N                    | N           | 94  | N                                 | N       | N                     | Y            | N           | N                  | NA                       | Y                  | 0               | 0                 | 0                  |  |  |
| 3       | Y                                                     | N            | N          | -                                | M                     | N                                       | N                       | N         | N          | N                                  | N            | N                    | N           | 84  | N                                 | N       | N                     | N            | N           | N                  | NA                       | N                  | 0               | I                 | 0                  |  |  |
| 30      | Y                                                     | Y            | N          | -                                | M                     | N                                       | N                       | N         | N          | N                                  | N            | Y                    | 103         | N   | Y                                 | N       | Y                     | N            | N           | N                  | N                        | 0                  | 0               | 0                 |                    |  |  |
| 44      | Y                                                     | Y            | N          | -                                | M                     | N                                       | N                       | N         | N          | N                                  | N            | Y                    | N           | 106 | N                                 | N       | N                     | N            | N           | N                  | NA                       | N                  | 0               | 0                 | 0                  |  |  |
| 41      | Y                                                     | Y            | Y          | -                                | E                     | Y                                       | N                       | N         | N          | N                                  | N            | N                    | N           | 79  | N                                 | N       | N                     | N            | N           | N                  | NA                       | N                  | 0               | I                 | 0                  |  |  |
| 45      | Y                                                     | N            | Y          | -                                | E                     | N                                       | N                       | N         | N          | N                                  | N            | N                    | ND          | N   | N                                 | N       | N                     | N            | N           | NA                 | Y                        | ND                 | ND              | ND                |                    |  |  |

**Supplementary Table 2 (continued):**

| Patient | Progression of Primary GAN Related Signs and Symptoms |              |            |                                  |                       |                                         |                         |           |            |                                    |              |                      | Pulmonary   |     | Additional GAN Signs and Symptoms |         |                       |              |             |                    |                          |                    |                 |                   | GAN Imaging        |  |  |
|---------|-------------------------------------------------------|--------------|------------|----------------------------------|-----------------------|-----------------------------------------|-------------------------|-----------|------------|------------------------------------|--------------|----------------------|-------------|-----|-----------------------------------|---------|-----------------------|--------------|-------------|--------------------|--------------------------|--------------------|-----------------|-------------------|--------------------|--|--|
|         | History of Unsteady/Abnormal Gait                     | Contractures | Spasticity | Patellar tendon DTR <sup>a</sup> | Babinski <sup>b</sup> | Scoliosis (Age of surgery) <sup>c</sup> | Decreased visual acuity | Nystagmus | Dysarthria | Dysphagia (Age Onset) <sup>c</sup> | NG or G-tube | Urinary <sup>d</sup> | Sleep Apnea | FVC | Seizures (Age Onset) <sup>e</sup> | Vertigo | Learning Difficulties | Macrocephaly | Hypothermia | Precocious Puberty | Menstrual Irregularities | Lactose Intolerant | MRI brain (CWM) | MRI brain (CerWM) | Spine MRI Thinning |  |  |
| 35      | Y                                                     | N            | N          | -                                | E                     | N                                       | N                       | N         | N          | N                                  | N            | N                    | 91          | N   | N                                 | N       | N                     | N            | N           | NA                 | Y                        | 0                  | 1               | 0                 |                    |  |  |
| 34      | Y                                                     | Y            | Y          | +++                              | E                     | N                                       | N                       | N         | N          | N                                  | N            | N                    | 93          | N   | N                                 | N       | Y                     | N            | N           | N                  | N                        | 0                  | 0               | 0                 |                    |  |  |
| 28      | Y                                                     | Y            | N          | -                                | M                     | N                                       | N                       | N         | N          | N                                  | N            | N                    | ND          | N   | N                                 | N       | N                     | N            | NA          | N                  | ND                       | ND                 | ND              |                   |                    |  |  |
| 32      | Y                                                     | Y            | Y          | -                                | M                     | Y                                       | Y                       | Y         | N          | N                                  | N            | N                    | 90          | N   | N                                 | N       | Y                     | N            | N           | NA                 | N                        | 1                  | 1               | 1                 |                    |  |  |
| 15      | Y                                                     | Y            | N          | -                                | M                     | N                                       | N                       | Y         | N          | N                                  | N            | N                    | 98          | N   | N                                 | N       | N                     | N            | Y           | NA                 | Y                        | 1                  | 2               | 1                 |                    |  |  |
| 17      | Y                                                     | N            | N          | -                                | ND                    | N                                       | Y                       | Y         | Y          | N                                  | N            | Y                    | ND          | N   | N                                 | N       | Y                     | N            | Y           | NA                 | Y                        | 1                  | 2               | 1                 |                    |  |  |
| 21      | Y                                                     | Y            | Y          | +++                              | M                     | Y                                       | Y                       | Y         | N          | N                                  | N            | N                    | 105         | N   | N                                 | N       | Y                     | N            | N           | N                  | N                        | 0                  | 0               | 0                 |                    |  |  |
| 24      | Y                                                     | Y            | N          | -                                | E                     | N                                       | N                       | N         | N          | N                                  | N            | N                    | 101         | N   | Y                                 | N       | Y                     | N            | N           | NA                 | Y                        | 0                  | 1               | 0                 |                    |  |  |
| 43      | Y                                                     | Y            | Y          | -                                | F                     | N                                       | N                       | N         | Y          | N                                  | N            | Y                    | ND          | N   | N                                 | N       | Y                     | N            | N           | NA                 | Y                        | ND                 | ND              | ND                |                    |  |  |
| 22      | Y                                                     | Y            | N          | -                                | E                     | N                                       | N                       | Y         | N          | Y                                  | N            | Y                    | 83          | N   | N                                 | Y       | Y                     | N            | N           | NA                 | N                        | 2                  | 2               | 1                 |                    |  |  |
| 14      | Y                                                     | Y            | N          | -                                | F                     | N                                       | Y                       | Y         | Y          | N                                  | N            | N                    | 97          | N   | N                                 | N       | N                     | N            | Y           | NA                 | Y                        | 1                  | 2               | 1                 |                    |  |  |
| 25      | Y                                                     | Y            | N          | -                                | M                     | Y                                       | Y                       | Y         | N          | Y                                  | N            | Y                    | 60          | N   | N                                 | N       | Y                     | N            | N           | NA                 | N                        | 1                  | 1               | 0                 |                    |  |  |
| 23      | Y                                                     | N            | N          | -                                | F                     | N                                       | Y                       | Y         | N          | N                                  | N            | N                    | 100         | N   | N                                 | Y       | Y                     | N            | N           | NA                 | N                        | 2                  | 2               | 1                 |                    |  |  |
| 29      | Y                                                     | Y            | N          | -                                | M                     | N                                       | Y                       | Y         | Y          | N                                  | N            | N                    | 57          | N   | Y                                 | Y       | Y                     | N            | N           | NA                 | Y                        | ND                 | ND              | 1                 |                    |  |  |
| 4       | Y                                                     | Y            | N          | -                                | ND                    | Y                                       | Y                       | Y         | Y          | Y                                  | N            | Y                    | ND          | N   | Y                                 | N       | Y                     | N            | N           | NA                 | Y                        | 2                  | 2               | 1                 |                    |  |  |



Supplementary Table 2 (continued):

| Patient | Progression of Primary GAN Related Signs and Symptoms |              |            |                                  |                       |                                         |                         |           |            |                                    |              |                      | Pulmonary   |     | Additional GAN Signs and Symptoms |         |                       |              |             |                    |                          |                    |                 |                   | GAN Imaging        |  |  |
|---------|-------------------------------------------------------|--------------|------------|----------------------------------|-----------------------|-----------------------------------------|-------------------------|-----------|------------|------------------------------------|--------------|----------------------|-------------|-----|-----------------------------------|---------|-----------------------|--------------|-------------|--------------------|--------------------------|--------------------|-----------------|-------------------|--------------------|--|--|
|         | History of Unsteady/Abnormal Gait                     | Contractures | Spasticity | Patellar tendon DTR <sup>a</sup> | Babinski <sup>b</sup> | Scoliosis (Age of surgery) <sup>c</sup> | Decreased visual acuity | Nystagmus | Dysarthria | Dysphagia (Age Onset) <sup>c</sup> | NG or G-tube | Urinary <sup>d</sup> | Sleep Apnea | FVC | Seizures (Age Onset) <sup>e</sup> | Vertigo | Learning Difficulties | Macrocephaly | Hypothermia | Precocious Puberty | Menstrual Irregularities | Lactose Intolerant | MRI brain (CWM) | MRI brain (CerWM) | Spine MRI Thinning |  |  |
| 13      | Y                                                     | Y            | N          | -                                | M                     | Y                                       | Y                       | Y         | Y          | N                                  | N            | N                    | Y           | 86  | N                                 | N       | N                     | N            | N           | Y                  | NA                       | Y                  | 1               | 1                 | 1                  |  |  |
| 5       | Y                                                     | Y            | N          | -                                | ND                    | Y                                       | Y                       | Y         | N          | Y                                  | N            | N                    | N           | ND  | N                                 | N       | N                     | N            | N           | Y                  | N                        | Y                  | 2               | 2                 | 2                  |  |  |
| 7       | Y                                                     | Y            | N          | -                                | ND                    | Y                                       | Y                       | Y         | Y          | Y                                  | Y            | Y                    | N           | ND  | N                                 | N       | Y                     | Y            | N           | N                  | NA                       | Y                  | 3               | 2                 | 3                  |  |  |
| 16      | Y                                                     | Y            | N          | -                                | E                     | Y                                       | N                       | N         | Y          | Y                                  | N            | Y                    | Y           | 58  | N                                 | Y       | Y                     | Y            | N           | N                  | NA                       | N                  | 2               | 2                 | 2                  |  |  |
| 26      | Y                                                     | Y            | N          | -                                | M                     | Y                                       | Y                       | Y         | Y          | Y                                  | N            | N                    | N           | 83  | N                                 | N       | N                     | N            | N           | N                  | NA                       | N                  | 2               | 3                 | 2                  |  |  |
| 27      | Y                                                     | Y            | N          | -                                | M                     | Y                                       | Y                       | Y         | Y          | N                                  | N            | Y                    | Y           | 91  | N                                 | N       | N                     | N            | N           | N                  | NA                       | N                  | 3               | 2                 | 2                  |  |  |
| 40      | Y                                                     | Y            | N          | -                                | E                     | Y                                       | Y                       | Y         | Y          | N                                  | N            | Y                    | Y           | 94  | N                                 | Y       | Y                     | Y            | Y           | Y                  | NA                       | N                  | ND              | ND                | 2                  |  |  |
| 6       | Y                                                     | Y            | N          | -                                | E                     | Y                                       | Y                       | Y         | Y          | Y                                  | N            | Y                    | Y           | ND  | N                                 | Y       | N                     | Y            | N           | Y                  | Y                        | N                  | 0               | 1                 | 0                  |  |  |
| 31      | Y                                                     | Y            | N          | -                                | M                     | N                                       | Y                       | Y         | Y          | N                                  | N            | N                    | N           | ND  | N                                 | Y       | Y                     | N            | N           | N                  | NA                       | Y                  | ND              | ND                | 2                  |  |  |
| 18      | Y                                                     | Y            | N          | -                                | ND                    | Y                                       | Y                       | Y         | Y          | Y                                  | Y            | N                    | N           | ND  | N                                 | N       | N                     | Y            | N           | N                  | Y                        | N                  | 3               | 3                 | 2                  |  |  |
| 33      | Y                                                     | Y            | N          | -                                | M                     | Y                                       | Y                       | Y         | Y          | N                                  | N            | Y                    | N           | 57  | N                                 | N       | N                     | Y            | N           | Y                  | Y                        | N                  | 1               | 2                 | 1                  |  |  |
| 9       | Y                                                     | Y            | N          | -                                | M                     | Y (11 yr)                               | Y                       | Y         | Y          | Y                                  | Y            | Y                    | Y           | ND  | N                                 | Y       | Y                     | N            | Y           | N                  | Y                        | N                  | 3               | 3                 | 3                  |  |  |
| 38      | Y                                                     | Y            | N          | -                                | E                     | Y                                       | N                       | N         | N          | N                                  | Y            | Y                    | N           | ND  | N                                 | N       | N                     | N            | N           | Y                  | NA                       | Y                  | ND              | ND                | 2                  |  |  |
| 8       | Y                                                     | Y            | N          | -                                | ND                    | Y                                       | Y                       | Y         | Y          | Y                                  | Y            | N                    | Y           | ND  | N                                 | N       | Y                     | Y            | Y           | Y                  | NA                       | N                  | 3               | 3                 | 2                  |  |  |
| 10      | Y                                                     | Y            | N          | -                                | ND                    | Y (13 yr)                               | Y                       | Y         | Y          | Y                                  | Y            | Y                    | Y           | ND  | Y (15 yr)                         | Y       | Y                     | Y            | Y           | N                  | NA                       | N                  | 3               | 2                 | 3                  |  |  |
| 20      | Y                                                     | Y            | N          | -                                | M                     | Y (10 yr)                               | Y                       | Y         | Y          | Y                                  | N            | Y                    | Y           | 44  | N                                 | N       | N                     | Y            | N           | Y                  | NA                       | N                  | 2               | 3                 | 3                  |  |  |

## Supplementary Table 2: Legend:

This table highlights the increased prevalence of additional motor and systemic signs and symptoms occurring in individuals with giant axonal neuropathy, such as: gait impairment, dysarthria, dysphagia, spasticity, scoliosis, and urinary symptoms as the disease progresses (those individuals with lower total MFM32 score or motor functional status are listed lower in the table). The presence or absence of disease associated conditions is marked by Y (Yes) or N (No). Clinical signs of upper motor neurone involvement include: presence of spasticity, brisk or +++ deep tendon reflexes at the patellar tendon, or an extensor Babinski response. Macrocephaly is defined as head circumference > +2 standard deviations above the mean, or > 98 percentile for age. We qualitatively define the level of severity of the T2 hyperintensity in the cerebral white matter and cerebellar white matter as well as the extent of spinal cord atrophy or thinning. Rating is as follows: 0 =normal, 1 = mild, 2 = moderate, and 3 = severe. Evaluations not completed are listed as ND = Not Done.

- a) Patellar tendon deep tendon reflexes: Graded as (+++) = brisk; (++) = normoactive); (+) =diminished; (-) =absent
- b) Babinski response: Graded as E (extensor); F (flexor); M (mute, no movement)
- c) Numbers in parentheses represent the reported age at onset; except for scoliosis, where the number represents age at time of surgical repair for scoliosis.
- d) Urinary symptoms included either urinary urgency, hesitancy to initiate voiding, or urinary incontinence.

Abbreviations in table are as follows: CWM= cerebral white matter, CerWM= cerebellar white matter, E= extensor Babinski response, F= flexor Babinski response, FVC = forced vital capacity, M= mute Babinski response, N= no, NA = not applicable, ND= not done, Y=yes (to note that a sign or symptom is present), yr = year

**Supplementary Figure 1: Reported age when assistance is required with ambulation in GAN**

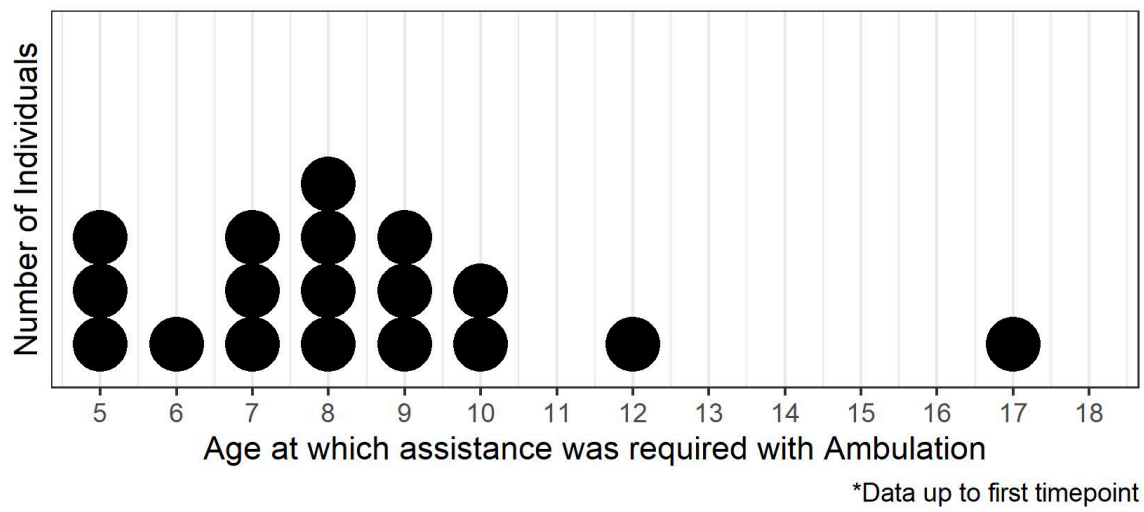

This plot highlights the progression of disease in our cohort, with each circle representing an individual patient’s family-reported age at which assistance with ambulation was required. 20 of 45 individuals required assistance or fully lost ambulation by the time of their first study visit (2 had unknown age of loss). The median age was 8 years old [IQR: 7-9 years].

## Supplementary Figure 2: Autonomic Impairment in GAN

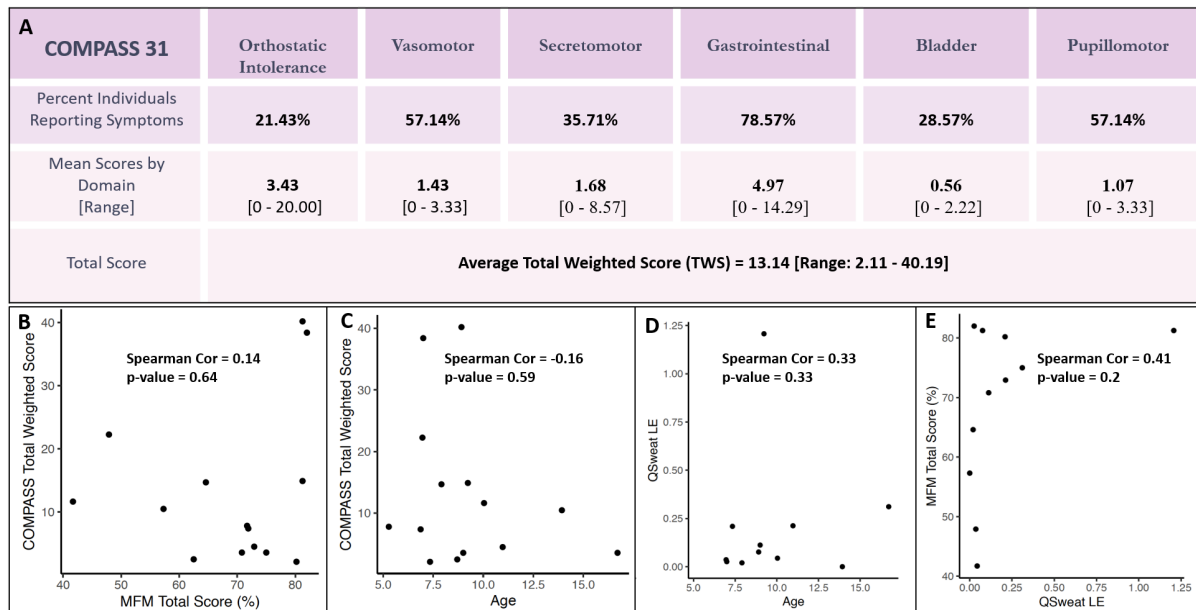

Patient/ parent reported and measured assessments of autonomic impairment in individuals with GAN are shown here based upon the first recorded autonomic measures in the natural history study. **A)** Individuals with GAN report symptoms related to autonomic dysfunction based upon the COMPASS 31 self-assessment questionnaire, specifically affecting the domains of autonomic function as demonstrated within the table, with gastrointestinal, vasomotor, and pupillomotor being most frequently reported as affected. The gastrointestinal domain also had the highest mean score (corresponding to worse reported function). The plots underneath show the correlations between the COMPASS 31 total weighted score (TWS) as compared to MFM-32 total score and age (**B** and **C**) and between the QSWEAT volume as compared to age and MFM-32 score (**D** and **E**). Overall, these two markers, the COMPASS 31 TWS and QSWEAT volume are abnormal, but do not correlate significantly to age or motor function.

**Supplementary Figure 3: MFM-20 Total Percent Score Compared to Age**

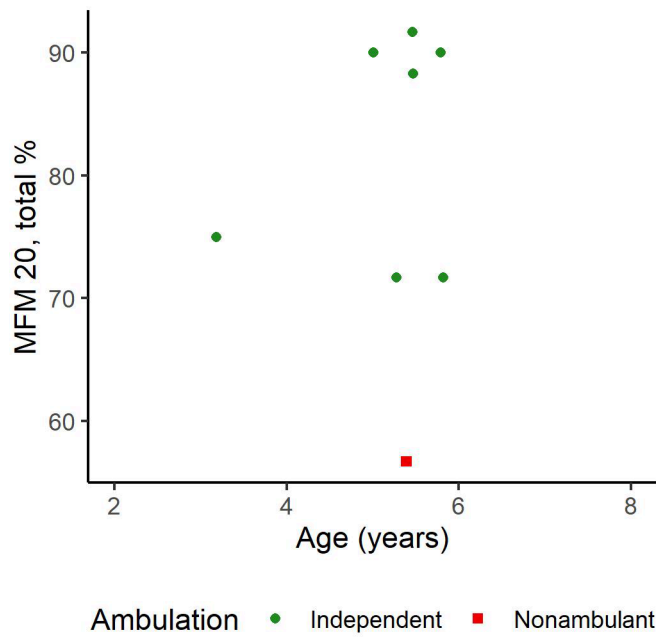

This plot demonstrates the MFM-20 total percent score as compared to age for those participants under 6 years old. There is not any clear trend between age versus MFM-20 score; however, this may be due to the concentration of participants around the same age and the low number ( $n=8$ ).
